# Supplementary material
Source: MDPI journal article supplement (https://www.mdpi.com/2073-4352/10/1/39)
Supplement: s1 [file s1]

Supporting information:

## Controllable Synthesis of Metal-Organic Framework/Polyethersulfone Composites

Xiaomin Guo <sup>1</sup>, Bin Zheng <sup>1,\*</sup>, Jinlei Wang <sup>1,\*</sup>

<sup>1</sup> School of Materials Science and Engineering, Xi'an University of Science and Technology, Xi'an 710054, P. R. China

Corresponding authors. E-mail address: zhengbin@xust.edu.cn (B. Zheng)

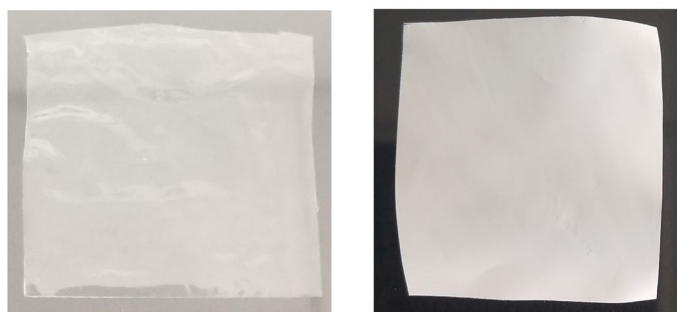

(a)

(b)

Figure S1. The blank experiment with presence of only polymer in solvent employing (a) the solvent evaporation and (b) the solvent exchange method. The solvent was DMF.

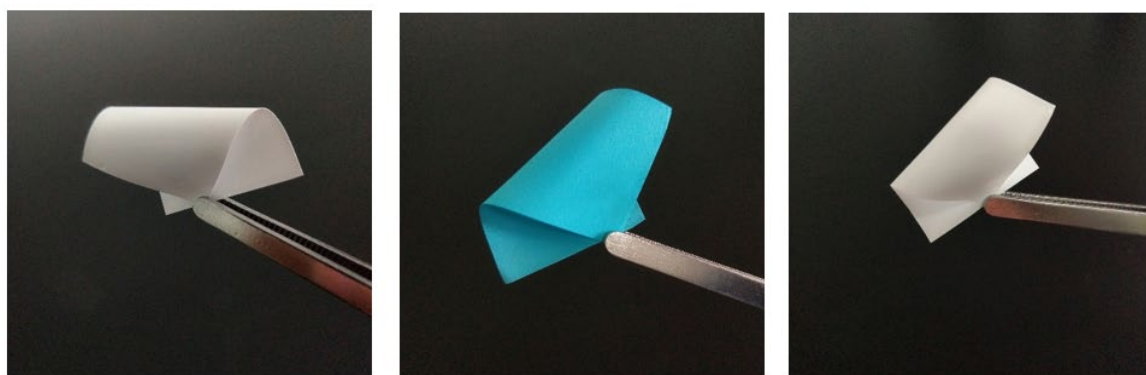

(a)

(b)

(c)

Figure S2. Optical images of (a) ZIF-8/PES, (b) HKUST-1/PES, and (c) UiO-66/PES membranes.

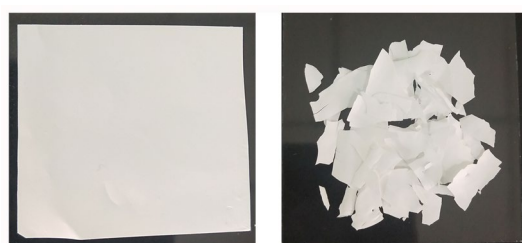

(a)

(b)

Figure S3. Optical images of the composites with the ZIF-8 loading of (a) 60 wt.% and (b) 65 wt.%.
